# Supplementary material for: Coordination tailoring of water-labile 3D MOFs to fabricate ultrathin 2D MOF nanosheets
Source: Royal Society of Chemistry journal article supplement (doi:10.1039/d0nr02956d), 2020-01-01
Supplement: d0nr02956d1.pdf [file d0nr02956d1.pdf]

## Electronic Supplementary Information

### **Coordination tailoring of water-labile 3D MOFs to fabricate ultrathin 2D MOF nanosheets**

Yuchong Wen,<sup>a</sup> Qiang Liu,<sup>a,b</sup> Shaodong Su,<sup>a</sup> Yuying Yang,<sup>a,b</sup> Xiaofang Li,<sup>a</sup> Qi-Long Zhu,<sup>\*a</sup> and Xintao Wu<sup>\*a</sup>

<sup>a</sup> *State Key Laboratory of Structural Chemistry, Fujian Institute of Research on the Structure of Matter, Chinese Academy of Sciences, Fuzhou 350002, China*

<sup>b</sup> *University of Chinese Academy of Sciences, Beijing 100049, China*

\*Corresponding Authors. E-mail: [qlzhu@fjirsm.ac.cn](mailto:qlzhu@fjirsm.ac.cn); [wxt@fjirsm.ac.cn](mailto:wxt@fjirsm.ac.cn)

**Materials.** All chemicals such as  $\text{Zn}(\text{NO}_3)_2 \cdot 6\text{H}_2\text{O}$ , 1,4-benzendicarboxylic acid ( $\text{H}_2\text{bdc}$ ), N,N-dimethylformamide, ethanol, etc. were purchased commercially and used without further purification. Ligand bdc was in-situ prepared from  $\text{H}_2\text{bdc}$  and NaOH. Ligand 1,2-bis(4'-pyridylmethylamino)-ethane (hsb-2) was synthesized employing previous method.<sup>[1]</sup>

**Synthesis of MOF HSB-W1.** A solution of hsb-2 (72 mg, 0.3 mmol) and  $\text{Zn}(\text{NO}_3)_2 \cdot 6\text{H}_2\text{O}$  (90 mg, 0.3 mmol) in  $\text{H}_2\text{O}/\text{EtOH}$  (6 mL/6 mL) was slowly layered over a solution of bdc (0.3 mmol) in  $\text{H}_2\text{O}/\text{DMF}$  (8 mL/4 mL). Colorless crystals HSB-W1 were yielded after one month.<sup>[2]</sup>

**Synthesis of MOF HSB-W5.** A solution of hsb-2 (12 mg, 0.05 mmol) and  $\text{Zn}(\text{NO}_3)_2 \cdot 6\text{H}_2\text{O}$  (15 mg, 0.05 mmol) in  $\text{H}_2\text{O}/\text{DMF}$  (6 mL/3 mL) was quickly added a solution of bdc (0.05 mmol) in  $\text{H}_2\text{O}/\text{DMF}$  (8 mL/4 mL) under vigorously stirring. Then, the reaction mixture was filtered immediately and the filtrate was evaporated for 6 days to give the colorless and leaf-like single crystals. Elemental analysis calcd (%) for  $\text{ZnC}_{22}\text{H}_{30}\text{N}_4\text{O}_8$  [ $\text{Zn}(\text{hsb-2})(\text{bdc}) \cdot 4\text{H}_2\text{O}$ ]: C 48.58, H 5.56, N 10.30; found: C 49.16, H 5.29, N 10.41. IR (KBr):  $\nu = 3398(\text{s}), 3276(\text{s}), 2948(\text{w}), 1944(\text{vw}), 1616(\text{m}), 1593(\text{s}), 1563(\text{s}), 1502(\text{m}), 1456(\text{w}), 1426(\text{m}), 1395(\text{s}), 1381(\text{s}), 1362(\text{s}), 1311(\text{vw}), 1290(\text{vw}), 1254(\text{vw}), 1225(\text{m}), 1140(\text{w}), 1097(\text{vw}), 1065(\text{w}), 1016(\text{m}), 980(\text{w}), 965(\text{vw}), 924(\text{m}), 884(\text{w}), 843(\text{m}), 818(\text{m}), 801(\text{m}), 745(\text{m}), 628(\text{w}), 617(\text{w}), 563(\text{w}), 540(\text{w}), 505(\text{w})$ .

**Synthesis of HSB-W5-Ns.** Bulk MOF HSB-W1 (20 mg) was added in 15 mL of water, followed by ultrasonication for 90 min. Then, the milky colloidal suspension was centrifugated at 10,000 rpm for 4 min to remove the water. The residual solid was next

washed with DMF and EtOH, respectively. After drying, 4.0 mg of the nanosheet sample, named as HSB-W5-Ns, was obtained.

**Characterization studies.** The structural determination of single crystal was performed on Rigaku SCXmini diffractometer with graphite-monochromated Mo-K $\alpha$  ( $\lambda = 0.71073$  Å) radiation at room temperature. The structure was solved by the SHELXL-2017 and OLEX2 program package.<sup>[3]</sup> All of the non-hydrogen atoms were refined anisotropically, and the hydrogen atoms attached to carbon were located at their ideal positions. Elemental analyses were performed by Vario MICRO CHNOS Elemental Analyzer. The Fourier-transform infrared spectra with KBr pellet were performed in the range of 4000–400 cm<sup>-1</sup> on a Perkin-Elmer Spectrum One FT-IR Spectrometer. PXRD data were collected on a DMAX-2500 diffractometer with Cu-K $\alpha$ . Thermal analyses were performed on a NETZSCH STA 449C apparatus from 20 to 1000 °C with a heating rate of 10 °C min<sup>-1</sup> under nitrogen flow. SEM characterization was conducted on a JEOL JSM-7800F instrument. TEM images of the samples were gained using FEI Tecnai G<sup>2</sup> F30 instrument equipped with energy-dispersive X-ray (EDX) detector. AFM images of the samples were obtained in a Bruker Dimension ICON atomic force microscope. X-ray photoelectron spectroscopy (XPS) measurements were performed on an ESCALAB 250Xi X-ray photoelectron spectrometer (Thermo Fisher) using an Al K $\alpha$  source (15 kV, 10 mA). The fluorescent emission and excitation spectra were recorded on a FLS920 fluorescence spectrophotometer.

[CCDC 1990806 contains the supplementary crystallographic data for this paper.

These data can be obtained free of charge from the Cambridge Crystallographic Data Centre via [www.ccdc.cam.ac.uk/data\\_request/cif](http://www.ccdc.cam.ac.uk/data_request/cif).]

**Table S1** Crystallographic data and refinement details for HSB-W5.

|                                                                                                                                                      |                                                                  |
|------------------------------------------------------------------------------------------------------------------------------------------------------|------------------------------------------------------------------|
| Empirical formula                                                                                                                                    | C <sub>22</sub> H <sub>30</sub> N <sub>4</sub> O <sub>8</sub> Zn |
| <i>M</i>                                                                                                                                             | 543.87                                                           |
| Crystal system                                                                                                                                       | triclinic                                                        |
| Space group                                                                                                                                          | <i>P</i> -1                                                      |
| <i>a</i> (Å)                                                                                                                                         | 10.854(6)                                                        |
| <i>b</i> (Å)                                                                                                                                         | 14.735(6)                                                        |
| <i>c</i> (Å)                                                                                                                                         | 17.464(7)                                                        |
| $\alpha$ (°)                                                                                                                                         | 67.045(18)                                                       |
| $\beta$ (°)                                                                                                                                          | 79.81(2)                                                         |
| $\gamma$ (°)                                                                                                                                         | 77.424(19)                                                       |
| <i>V</i> /Å <sup>3</sup>                                                                                                                             | 2497.0(19)                                                       |
| <i>Z</i>                                                                                                                                             | 4                                                                |
| D <sub>c</sub> /g cm <sup>-3</sup>                                                                                                                   | 1.447                                                            |
| $\mu$ /mm <sup>-1</sup>                                                                                                                              | 1.036                                                            |
| 2 $\theta$ <sub>range</sub> (°)                                                                                                                      | 6.07 to 49.998                                                   |
| <i>h, k, l, ranges</i>                                                                                                                               | -12 to 12,<br>-17 to 17,<br>-20 to 20                            |
| <i>F</i> (000)                                                                                                                                       | 1136.0                                                           |
| <i>R</i> <sub><i>I</i></sub> , <sup>a</sup> <i>wR</i> <sub>2</sub> <sup>b</sup> [ <i>I</i> > 2 $\sigma$ ( <i>I</i> )]                                | 0.0799, 0.1636                                                   |
| GOF on <i>F</i> <sup>2</sup>                                                                                                                         | 1.141                                                            |
| <sup>a</sup> <i>R</i> = $\Sigma( F_o  -  F_c )/\Sigma F_o $ . <sup>b</sup> <i>Rw</i> = $\{\Sigma w[(F_o^2 - F_c^2)^2]/\Sigma w[(F_o^2)^2]\}^{1/2}$ . |                                                                  |

**Table S2** Selected bond lengths (Å) and angles (°) of HSB-W5.

|                                     |            |
|-------------------------------------|------------|
| Zn1-N3                              | 2.220(4)   |
| Zn1-N4                              | 2.115(4)   |
| Zn1-N8 <sup>a</sup>                 | 2.224(4)   |
| Zn1-O1                              | 2.043(4)   |
| Zn1-O5 <sup>b</sup>                 | 1.993(4)   |
| Zn2-N1                              | 2.222(4)   |
| Zn2-N5                              | 2.137(5)   |
| Zn2-N6                              | 2.215(5)   |
| Zn2-O3                              | 2.007(4)   |
| Zn2-O7                              | 2.068(4)   |
| N8-Zn1 <sup>c</sup>                 | 2.224(4)   |
| N3-Zn1-N8 <sup>a</sup>              | 172.93(18) |
| N4-Zn1-N3                           | 81.53(17)  |
| N4- Zn1-N8 <sup>a</sup>             | 92.73(17)  |
| O1- Zn1-N3                          | 93.89(16)  |
| O1- Zn1-N4                          | 139.76(17) |
| O1- Zn1-N8 <sup>a</sup>             | 87.82(16)  |
| O5 <sup>b</sup> -Zn1-N3             | 96.15(17)  |
| O5 <sup>b</sup> Zn1-N4              | 117.23(17) |
| O5 <sup>b</sup> Zn1-N8 <sup>a</sup> | 90.14(17)  |
| O5 <sup>b</sup> Zn1-O1              | 103.00(17) |
| N5- Zn2-N1                          | 91.98(19)  |
| N5- Zn2-N6                          | 81.2(2)    |
| N6- Zn2-N1                          | 170.0(2)   |
| O3- Zn2-N1                          | 91.92(16)  |
| O3- Zn2-N5                          | 118.9(2)   |
| O3- Zn2-N6                          | 97.8(2)    |
| O3- Zn2-O7                          | 99.61(16)  |
| O7- Zn2-N1                          | 86.94(16)  |
| O7- Zn2-N5                          | 141.4(2)   |
| O7- Zn2-N6                          | 93.75(18)  |

Symmetry codes: (a) 1+x, +y, -1+z; (b) -x, 1-y, -z; (c) -1+x, +y, 1+z.

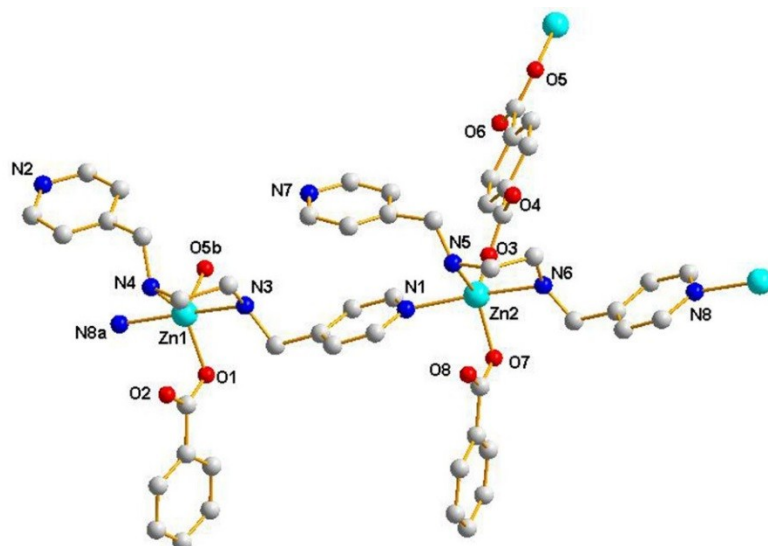

**Fig. S1** View of the coordination environment of Zn(II) ion in HSB-W5 (hydrogen atoms and free water molecules have been omitted for clarity).

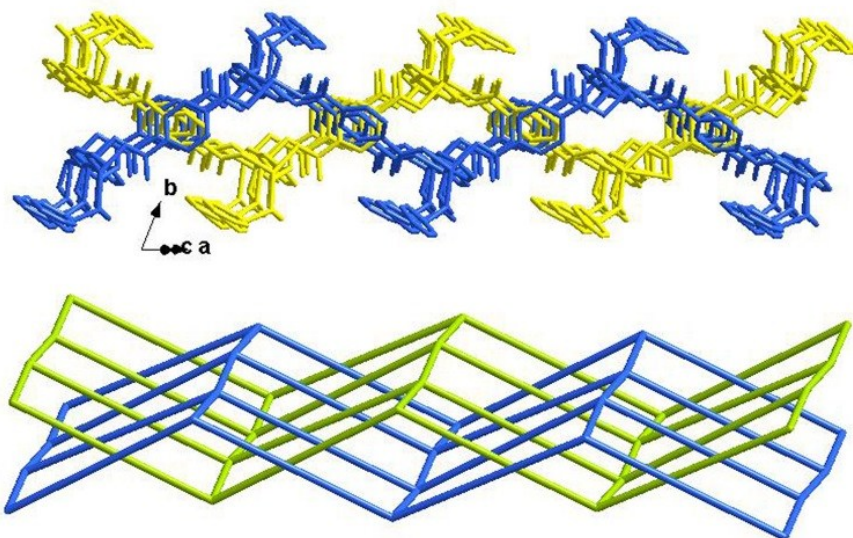

**Fig. S2** A single interpenetrated 2D layer of HSB-W5.





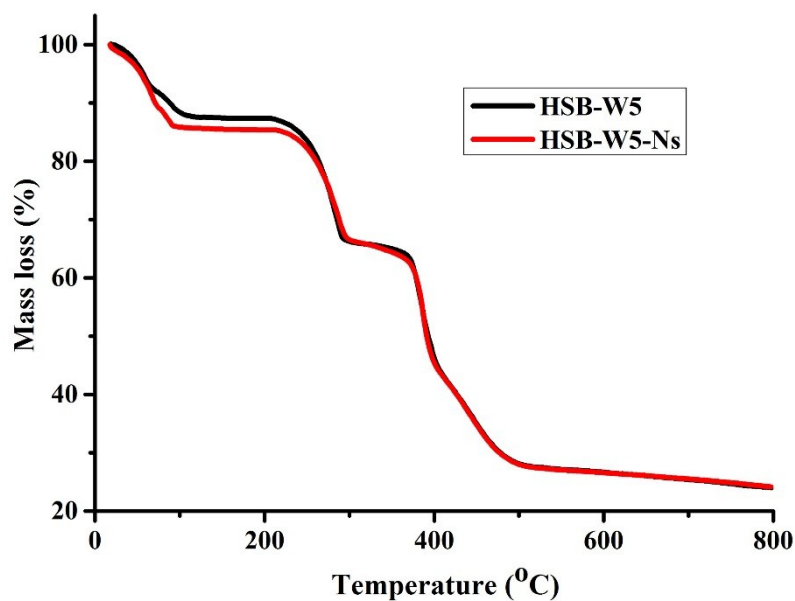

**Fig. S4** TGA plots of HSB-W5 and HSB-W5-Ns.

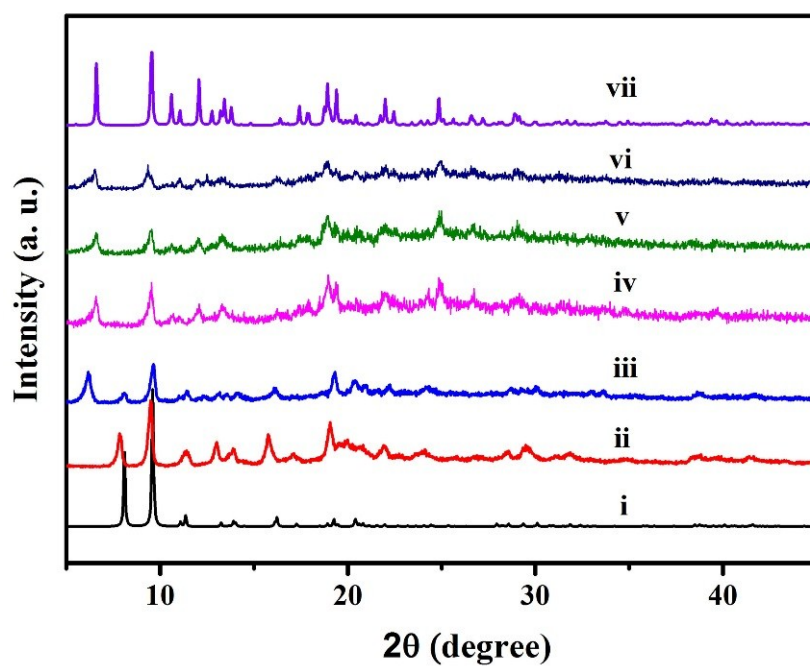

**Fig. S5** PXRD patterns of the samples treated with different ultrasonic time in water. i) HSB-W1 (simulated); ii) pristine HSB-W1; iii) two min; iv) five min; v) ten min; vi) ninety min; vii) simulated HSB-W5.

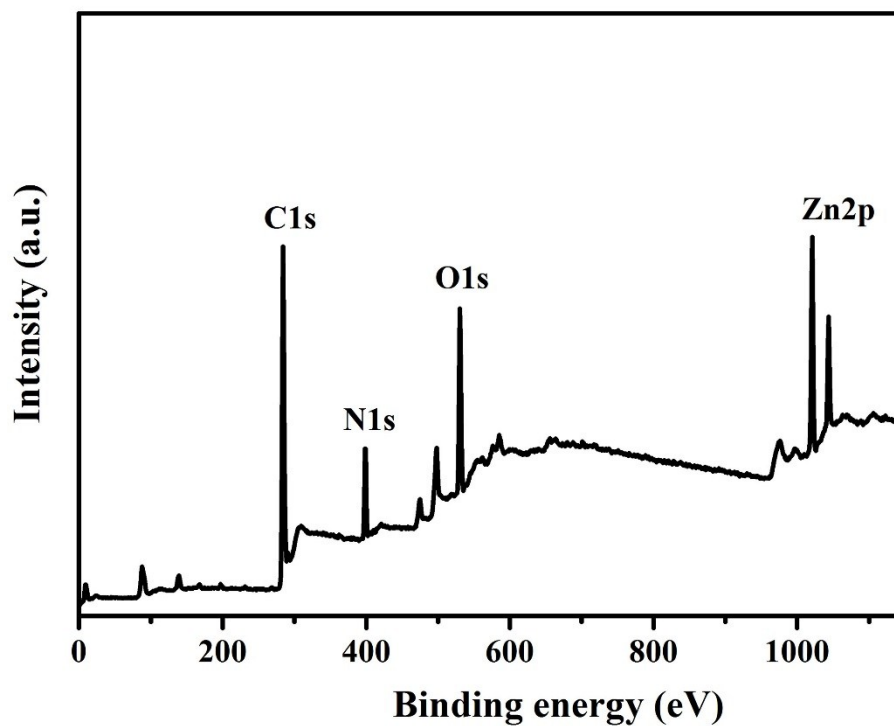

**Fig. S6** XPS spectrum of HSB-W5-Ns.

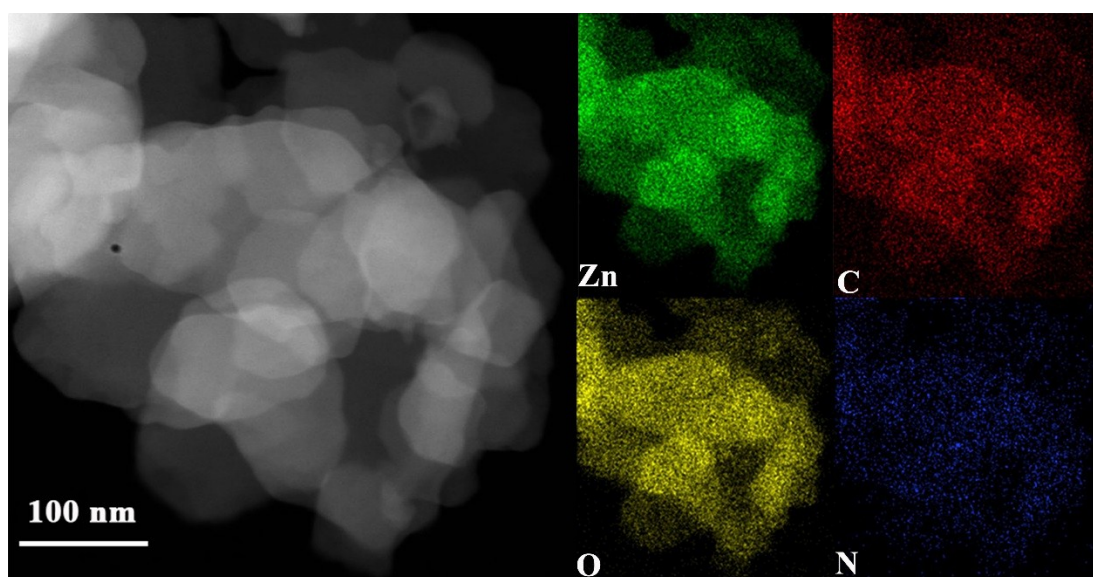

**Fig. S7** TEM image and the corresponding EDX elemental mapping images of HSB-W5-Ns for Zn, C, O, and N.

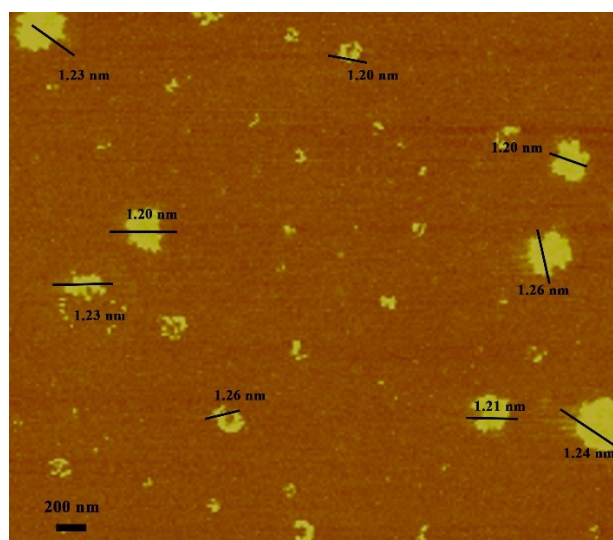

**Fig. S8** AFM image of HSB-W5-Ns indicating the average thickness of  $\sim 1.2$  nm.

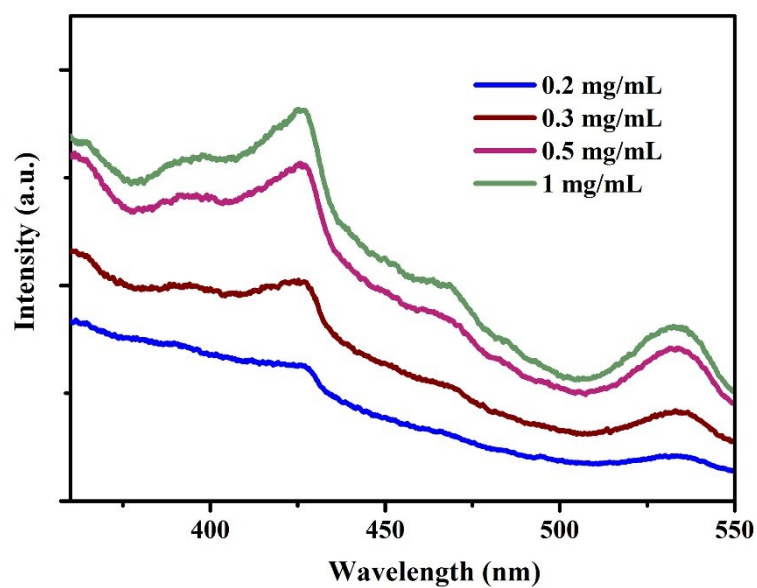

**Fig. S9** Relative emission spectra of the HSB-W5-Ns aqueous suspensions with different concentrations.

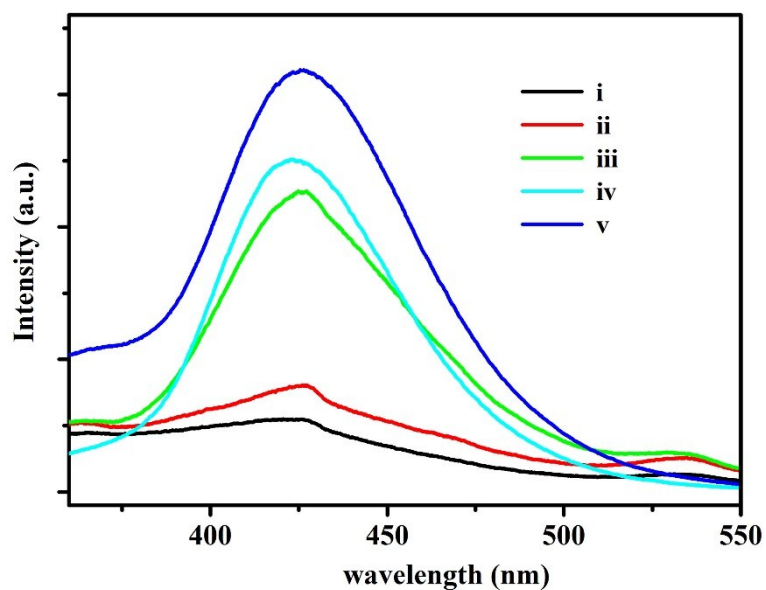

**Fig. S10** Comparison of the fluorescent emissions: i) HSB-W5-Ns dispersed in water ( $0.2 \text{ mg} \cdot \text{mL}^{-1}$ ); ii, iii) ultrasonic irradiation of HSB-W1 in water for 10 and 90 min, respectively; iv) clear reaction solution by remove of the formed HSB-W5-Ns; v) the bdc-Zn(II) mixture obtained by adding a small amount of  $\text{Zn}(\text{NO}_3)_2 \cdot 4\text{H}_2\text{O}$  to the solution of bdc in water.

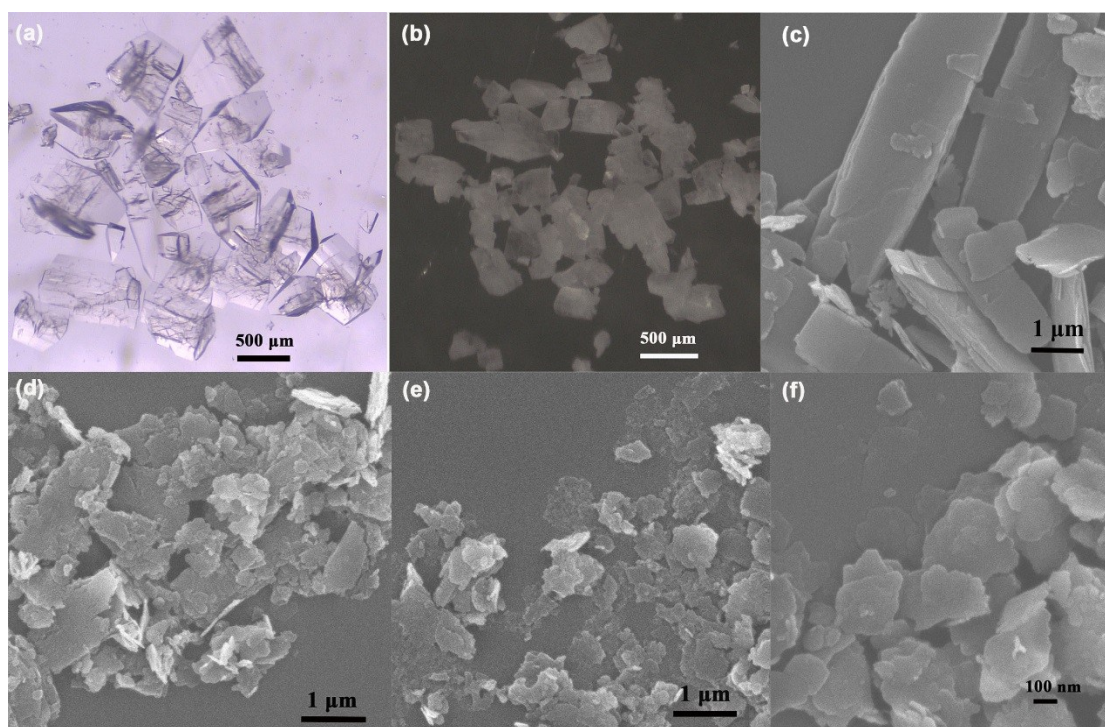

**Fig. S11** Photographic and SEM images of the samples: (a, b) pristine HSB-W1; (c) upon ultrasonic irradiation for 10 min; (d) upon ultrasonic irradiation for 30 min; (e) upon ultrasonic irradiation for 60 min; (f) upon ultrasonic irradiation for 90 min.

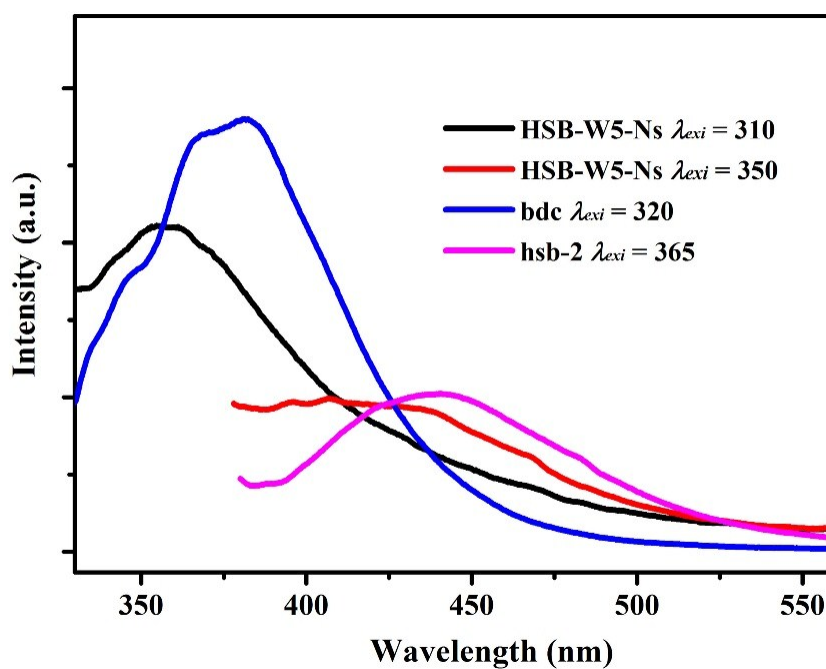

**Fig. S12** Fluorescent spectra of solid HSB-W5-Ns and free ligands.

### ***References:***

- [1] Y.-H. Wen, T.-L. Sheng, S.-M. Hu, Y.-L. Wang, C.-H. Tan, X. Ma, Z.-Z. Xue, Y. Wang and X.-T. Wu, *CrystEngComm* 2013, **15**, 2714.
- [2] Y.-H Wen, T.-L Sheng, X.-Q. Zhu, C. Zhuo, S.-D. Su, H.-R. Li, S.-M. Hu, Q.-L. Zhu and X.-T. Wu, *Adv. Mater.* 2017, **29**, 1700778.
- [3] a) O. V. Dolomanov, L. J. Bourhis, R. J. Gildea, J. A. K. Howard and H. Puschmann, *J. Appl. Cryst.* 2009, **42**, 339; b) L. J. Bourhis, O. V. Dolomanov, R. J. Gildea, J. A. K. Howard and H. Puschmann, *Acta Cryst. A* 2015, **71**, 59; c) G. M. Sheldrick, *Acta Crystallogr., Sect. C: Struct. Chem.* 2015, **71**, 3.
